# Supplementary material for: FDAAA legislation is working, but methodological flaws undermine the reliability of clinical trials: a cross-sectional study
Source: PeerJ journal article supplement (doi:10.7717/peerj.1015), 2015-06-25
Supplement: APPENDIX_2.pdf [file APPENDIX_2.pdf]

1 **APPENDIX 2. SEARCH STRATEGY FOR PUBLISHED PAPERS**

2  
3 Based on the data gathered from ClinicalTrials.gov, we searched for published trials on  
4 Pubmed, Embase, Lilacs, Cochrane Central, and Google Scholar according to the following  
5 search strategy:

- 6  
7 (A) Search for the National Clinical Trials (NCT) number;  
8 (B) Search for the name of the primary investigator;  
9 (C) Search for the name of other investigators;  
10 (D) Search for MeSH descriptors of the biological agents (see Appendix 1); and  
11 (F) Search for the title of the protocol.

12  
13 Studies were considered *published* when a scientific paper or an abstract was published  
14 in an indexed journal or in conference proceedings.
